# Supplementary material for: Targeted Integration of siRNA against Porcine Cytomegalovirus (PCMV) Enhances the Resistance of Porcine Cells to PCMV
Source: MDPI journal article supplement (doi:10.3390/microorganisms12040837), 2024-04-22
Supplement: s1 [file s1]

## Supplementary information

**Table S1.** Partial primer sequences used for agarose gel electrophoresis and sequencing

| Gene Target | sequences                                                  | Product length                   |
|-------------|------------------------------------------------------------|----------------------------------|
| PCMV        | F: ACGGGGATCGACGAGAAAG<br>R: GAAGAGAAAGGAAGTGAAGG          | 320                              |
| PCMV-gB     | F: TTCCTGTAGATGAAGCTGGAT<br>R: AGGGATAGTTTCTTTGGTCCA       | 443                              |
| RT-PCMV-gB  | F: TTCCGCTGCCGAGATTAGAAACCA<br>R: CTCAACCGATTACCTGTACCGAGT | 268                              |
| DS1         | F: CTGAGTTTTACAGTCATCCC<br>R: TACCAAACATACAAAAGAACTG       | 1203                             |
| RS1         | F: CCACCACCAATTAACACTACC<br>R: TATTAGCATTACGGCAACTGAG      | 281 (After integration:<br>1394) |
| M1          | F: GGTCTGCTGGTGTGAGTG<br>R: CCGAGGCTGGAGTTCTACA            | 428 (After integration:<br>535)  |
| M2          | F: CATAGTGAAGCCACAGAT<br>R: CCGAGGCTGGAGTTCTACA            | 174                              |
| M3          | F: CATAGTGAAGCCACAGAT<br>R: CACCGAGGCAGTAGGCAGACACT        | 60                               |

\*F: Forward primer, R: Reverse primer

**Table S2.** SiRNA targeting sequence

| siRNA              | sequences                     | Reverse sequences             |
|--------------------|-------------------------------|-------------------------------|
| U77                | CGGACACUGGCAUUAUUCAU<br>GGCAU | AUGCCAUGAAAUAUGCCAGU<br>GUCCG |
| U57                | GAGGCCAUACUCGGCAUCUA<br>CUGUA | UACAGUAGAUGCCGAGUAUG<br>GCCUC |
| U51                | GGAUACUGCGUUCUACAUA           | UAUGUAGAACGCAGUAUCC           |
| U38-1              | CCAGAUUCUACAUCGAUAA           | UUAUCGAUGUAGAAUCUGG           |
| U38-2              | CAACUACAGACAUCAUGUA           | UACAUGAUGUCUGUAGUUG           |
| U12                | GAUGCAGACUUUGCGAUAA           | UUAUCGCAAAGUCUGCAUC           |
| nontargeting siRNA | UUCUCCGAACGUGUCACGU           | ACGUGACACGUUCGGAGAA           |

**Table S3.** OTS design for Rosa26 locus

| OTS and sgRNA (pRosa26) | sequences |
|-------------------------|-----------|
|-------------------------|-----------|

|       |                       |
|-------|-----------------------|
| sgRNA | ATCTTGACTA CCACTGCGAT |
| R1    | GCCTTGACTA CCACTGGATG |
| R2    | ATCTTGACTA CCACTTATAC |
| R3    | GTCTTGACAC CCACTGGAGC |
| R4    | AGCTTGACTA CCACTGAACC |
| R5    | GGCTCAGTGG TAGTCAAGGC |
| R6    | CGCAGTGGTA GTCGAGATGT |
| R7    | AAGTGGTAGT CAAGAGAGGA |
| R8    | ATCTTGACTA CCAATTCATT |
| R9    | AGAAAAGTGG TAGTCAAGAT |
| R10   | GGTCTTGACT ACCACAACCT |

**Table S4.** OTS design for miR-17-92 locus

| OTS and sgRNA (miR-17-92) | sequences             |
|---------------------------|-----------------------|
| sgRNA                     | TGTCGATGTA GAATCTGCC  |
| M1                        | ATCAGATTCT ACATCCCCAG |
| M2                        | ACTGGCAGA TTCTACAATT  |
| M3                        | AGTGGAGTCG ATGTAGAATG |
| M4                        | ATTCTACATA AATTTATCTG |
| M5                        | GATGTGTAGA ATCTGCCAAT |
| M6                        | CATGTAGAAT CTGCTCCAT  |
| M7                        | TTGATGTAGA ATCTGAACA  |
| M8                        | TTAAGTCATG TAGAATCTG  |
| M9                        | TGTTCAGAT TCTACATCAC  |
| M10                       | TCTAAGCAGA TTCTACATTC |

**Table S5.** Primer design for OTS detection at the Rosa26 locus

| OTS (Rosa26) | Forward primer           | Reverse primer              |
|--------------|--------------------------|-----------------------------|
| OTS-R1       | GTATTACAGTTGAGGTCCACGATT | TGTAACCTGCTGGTACTCATTC<br>T |
| OTS-R2       | ACTTGTGCTCCAGTTGAATCC    | TGCTGAGGCTTGCTGACA          |
| OTS-R3       | TGTGAATCTCTATGGTCGTAGG   | TGCTCCAGTGGTAGTCAAGA        |
| OTS-R4       | TCTCCTACTCCGTGCTGTT      | ACTATGCTGACTGTTAGAATGG      |
| OTS-R5       | AAGAAGGAGGAGGAAGAGATGG   | GCACAGACATACAGAGGAATG<br>G  |
| OTS-R6       | GTCTGTCTACGCTGGTCCGA     | TGCCTTGGCTCTCAGGTCTC        |
| OTS-R7       | GTCACAAGTGCGGCTCTAA      | AGTACATGGAACACAGCAGAT<br>T  |

|         |                        |                        |
|---------|------------------------|------------------------|
| OTS-R8  | GCCGATACAAGTTACCAGACA  | GCACAGGAAGGTGAGAAGG    |
| OTS-R9  | AGTGGCATCAGTGACCTATTCC | GCAGTTCCTCTCGCATCTCTAT |
| OTS-R10 | TCCGTTCCGTTGATGTCCATAT | CGGCAGGAAGTCCAATAAGGT  |

**Table S6.** Primer design for OTS detection at the miR-17-92 locus

| OTS (miR-17-92) | Forward primer         | Reverse primer                |
|-----------------|------------------------|-------------------------------|
| OTS-M1          | GACATGACATGCGAGAGGATT  | GACACATCACAGGAGAGGAA<br>C     |
| OTS-M2          | AAGGCAGAGTCCTACCTACTAA | GGGATTTCCTGGCATAACATTAGA<br>G |
| OTS-M3          | TTGTGATGCTGCTGCTACC    | TCTTCTTCTGGCTGTAACCTGT        |
| OTS-M4          | CAGCAACGCCAGATCCTTA    | GGTGGTCGTCAGAACTCTC           |
| OTS-M5          | CACACTCGGCATCCTAATCTA  | TCCGTGTTCAAGTGATGTCATT        |
| OTS-M6          | TGTGGATGTTAGCGACTTGGA  | TTGGACTGATGGAGCAGATTCT        |
| OTS-M7          | CTCTCCACTCTGGTACACTGA  | GCCACGAAGACAAGTTCTGT          |
| OTS-M8          | CACTCTCCGTCCTCCTCAT    | TGCCATCTGCTCCTACAAC           |
| OTS-M9          | AGAGCACAAGGCAGGGATAG   | TCCAGCCAATGAGACCACTT          |
| OTS-M10         | GCAGAGGTTGGTTCATTAGGTT | TAAGCCACGGTGTAATTAGCA<br>A    |
